# Supplementary material for: An in situ spectroscopic study of the local structure of oxyfluoride melts: NMR insights into the speciation in molten LiF–LaF3–Li2O systems
Source: Royal Society of Chemistry journal article supplement (doi:10.1039/c4dt00926f), 2014-04-28
Supplement: c4dt00926f1.pdf [file c4dt00926f1.pdf]

Cite this: DOI: 10.1039/c0xx00000x

www.rsc.org/xxxxxx

ARTICLE TYPE

# In-situ spectroscopic study of the local structure of oxyfluoride melts: I. A NMR insight into the speciation LiF-LaF<sub>3</sub> containing oxides Supplementary Information

Anne-Laure Rollet,<sup>\*a</sup> Haruaki Matsuura<sup>a,b</sup> and Catherine Bessada<sup>b</sup>

5

## 10 1. X-Ray diffraction and MAS NMR characterization of the samples after HT NMR experiments

To identify the phases coexisting in the sample after NMR measurement, X-ray diffraction analysis on some samples have  
15 been also performed. The fig. S1 presents the X-Ray diffractograms of LiF-LaF<sub>3</sub> ( $x_{\text{LaF}_3} = 0.20$ ) + Li<sub>2</sub>O ( $x_{\text{Li}_2\text{O}} = 0.20$ ) and of LiF-LaF<sub>3</sub> ( $x_{\text{LaF}_3} = 0.20$ ) + Li<sub>2</sub>O ( $x_{\text{Li}_2\text{O}} = 0.50$ ) after High Temperature NMR experiments.

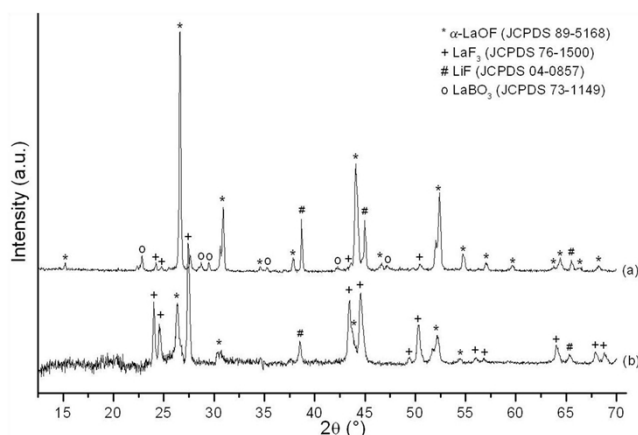

20 Fig. S1. X-ray diffraction patterns of the solidified compounds after high temperature NMR experiments: (a) LiF-LaF<sub>3</sub> ( $x_{\text{LaF}_3} = 0.20$ ) + Li<sub>2</sub>O ( $x_{\text{Li}_2\text{O}} = 0.50$ ) and (b) LiF-LaF<sub>3</sub> ( $x_{\text{LaF}_3} = 0.20$ ) + Li<sub>2</sub>O ( $x_{\text{Li}_2\text{O}} = 0.20$ )

No Li<sub>2</sub>O is observed in the diffractograms whatever its concentration. It has completely reacted with LaF<sub>3</sub> to form LaOF.

25 No La<sub>2</sub>O<sub>3</sub> is either observed. However in the case of  $x_{\text{Li}_2\text{O}} = 0.50$ , the sample was heated for approximately 40 minutes at temperature up to 1400K and small amount of LaOF has reacted with the boron nitride (coming from the crucible) to form LaBO<sub>3</sub>.

The <sup>19</sup>F MAS NMR spectra are displayed in figure S2. At  
30  $x_{\text{Li}_2\text{O}} = 0$ , the peak of LiF at -201ppm and the three peaks of LaF<sub>3</sub> can be observed. At  $x_{\text{Li}_2\text{O}} = 1$ , the peak of LaOF at -35ppm is

clearly visible along the one of LiF. This value is close to the value of rhombohedral-LaOF at room temperature obtained by Woo et al. by thermal decomposition of LaFCO<sub>3</sub>.<sup>1</sup>

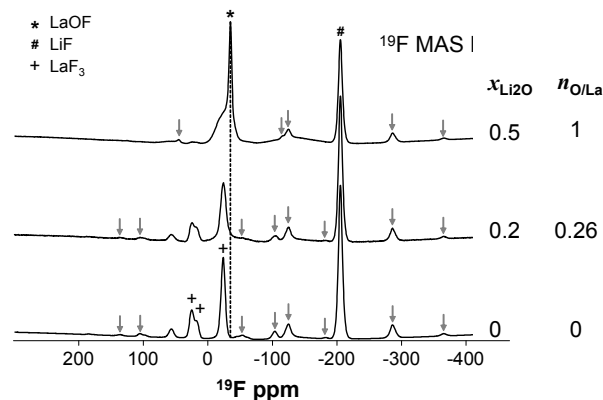

35 Fig. S2. <sup>19</sup>F MAS NMR of the solidified compounds after high temperature NMR experiments for several amount of Li<sub>2</sub>O. The arrows indicate the spinning side bands.

## 2. Behaviour during heating

40 In the following figures are presented the NMR spectra of <sup>19</sup>F and <sup>139</sup>La from 790K to 1393 K in the mixture of LiF-LaF<sub>3</sub> ( $x_{\text{LaF}_3} = 0.2$ ,  $x_{\text{LiF}} = 0.8$ ) + Li<sub>2</sub>O:

- $x_{\text{Li}_2\text{O}} = 0$  figure S3
- $x_{\text{Li}_2\text{O}} = 0.1$  figure S4 and S5
- $x_{\text{Li}_2\text{O}} = 0.3$  figure S6 and S7
- $x_{\text{Li}_2\text{O}} = 0.5$  figure S8 and S9

45

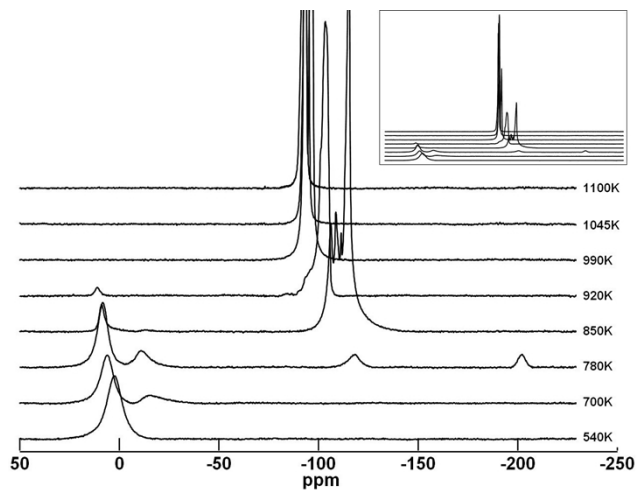

Fig. S3.  $^{19}\text{F}$  NMR spectra of  $\text{LaLi}_4\text{F}_7$  without  $\text{Li}_2\text{O}$  for increasing temperature. The liquid peak is not fully represented to allow us to see the  $\text{LaOF}$ ,  $\text{LaF}_3$  and  $\text{LiF}$  solid peaks. In the encart is shown the full spectra.

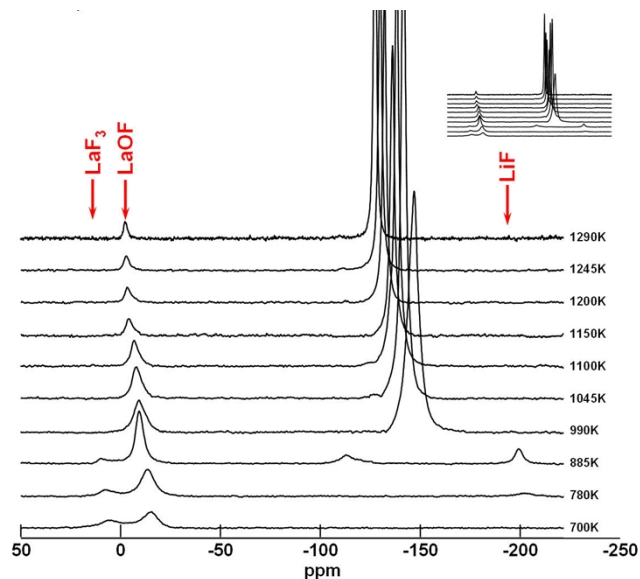

Fig. S6.  $^{19}\text{F}$  NMR spectra of  $\text{LaLi}_4\text{F}_7 + \text{Li}_2\text{O}$  ( $x_{\text{Li}_2\text{O}} = 0.30$ ) for increasing temperature.

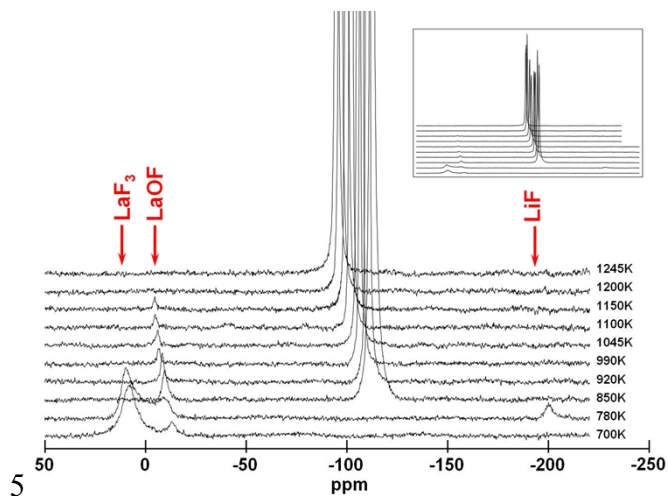

Fig. S4.  $^{19}\text{F}$  NMR spectra of  $\text{LaLi}_4\text{F}_7 + \text{Li}_2\text{O}$  ( $x_{\text{Li}_2\text{O}} = 0.10$ ) for increasing temperature. The liquid peak is not fully represented to allow us to see the  $\text{LaOF}$ ,  $\text{LaF}_3$  and  $\text{LiF}$  solid peaks. In the encart is shown the full spectra.

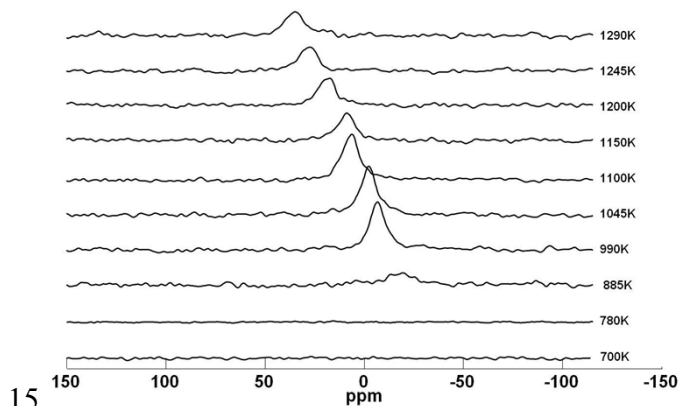

Fig. S7.  $^{139}\text{La}$  NMR spectra of  $\text{LaLi}_4\text{F}_7 + \text{Li}_2\text{O}$  ( $x_{\text{Li}_2\text{O}} = 0.30$ ) for increasing temperature.

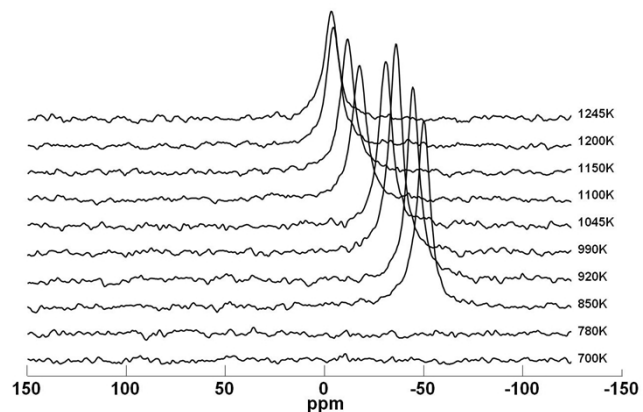

Fig. S5.  $^{139}\text{La}$  NMR spectra of  $\text{LaLi}_4\text{F}_7 + \text{Li}_2\text{O}$  ( $x_{\text{Li}_2\text{O}} = 0.10$ ) for increasing temperature.

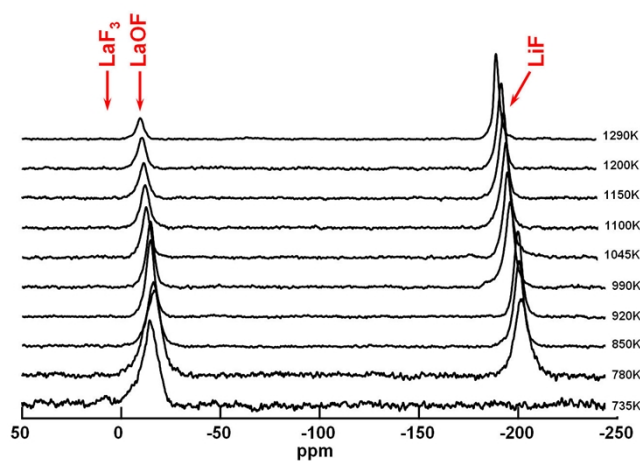

Fig. S8.  $^{19}\text{F}$  NMR spectra of  $\text{LaLi}_4\text{F}_7 + \text{Li}_2\text{O}$  ( $x_{\text{Li}_2\text{O}} = 0.50$ ) for increasing temperature.

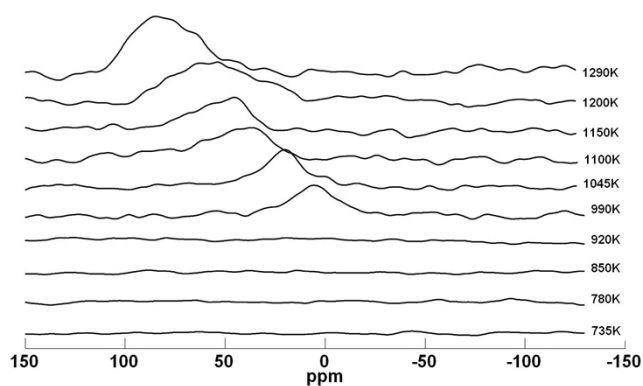

Fig. S9.  $^{139}\text{La}$  NMR spectra of  $\text{LaLi}_4\text{F}_7 + \text{Li}_2\text{O}$  ( $x_{\text{Li}_2\text{O}} = 0.50$ ) for increasing temperature.

*Chem. Mater.*, 2006, **18**, 510.

- 6 A. I. Agulyanskii and V. A. Bessonova, *Zh. Neorg. Khim.*, 1982, **27** [4], 1029-1032; *Russ. J. Inorg. Chem. (Engl. Transl.)*, 1982, **27** [4] 579-581.

### 3. HT NMR experiments on the $\text{LaF}_3$ -LiF phase diagram

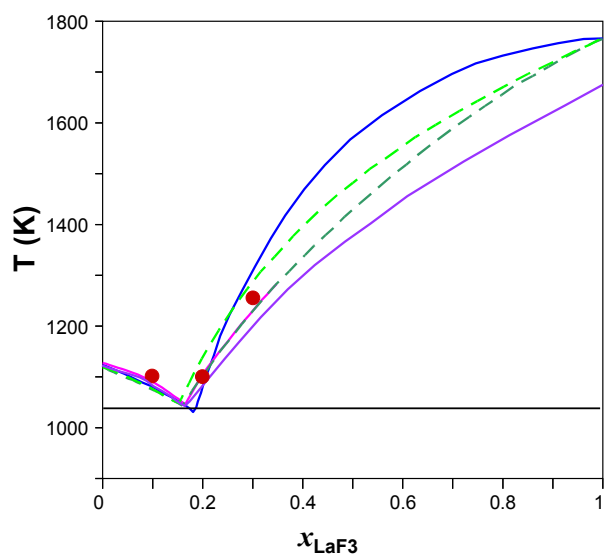

Fig. S10. LiF- $\text{LaF}_3$  phase diagram from Fedorov<sup>2</sup> (blue line), Beilmann et al.<sup>3</sup> (dashed dark green line), F. Abdoun et al. (pink line)<sup>4</sup>, Van der Meer et al.<sup>5</sup> (dashed light green line), A. I. Agulyanskii and V. A. Bessonova<sup>6</sup> (purple line). The red points indicate the position of the experiments made in this paper.

If LaOF precipitation occurs when  $\text{Li}_2\text{O}$  is added to the system, it induces a shift in the phase diagram toward poorer composition in  $\text{LaF}_3$  as shown in figure S11. For  $\text{LaF}_3$ -LiF 30-70mol%, the experimental temperature then becomes much higher than the liquidus temperature. The consequence in our experiments is a vaporization of LiF, we have therefore kept the experiment duration short and we haven't investigated the effect of temperature on this system. For  $\text{LaF}_3$ -LiF 10-90mol%, we had to increase the temperature to reach the liquidus.

### Notes and references

- 1 D. C. Woo, M.-H. Lee, W.-S. Jung, *Ceram. Int.*, 2013, **39**, 1533.
- 2 P. P. Fedorov, *Russ. J. Inorg. Chem.*, 1999, **44**(11), 1703.
- 3 M. Beilmann, O. Beneš, R. J. M. Konings, T. Fanghänel, *J. Chem. Thermodyn.*, 2011, **43**, 1515.3
- 4 F. Abdoun, M. Gaune-Escard, G. Hatem, *J. Phase Equilib.*, 1997, **18**, 6.
- 5 J. P. M. van der Meer, R. J. M. Konings, K. Hack, H. A. J. Oonk,
